# Supplementary material for: High resolution cyclostratigraphy of the early Eocene – new insights into the origin of the Cenozoic cooling trend
Source: Copernicus journal article supplement (doi:10.5194/cp-5-309-2009), 2009-07-06
Supplement: Supplementary file 1 [file cp-5-309-2009-supplement.pdf]

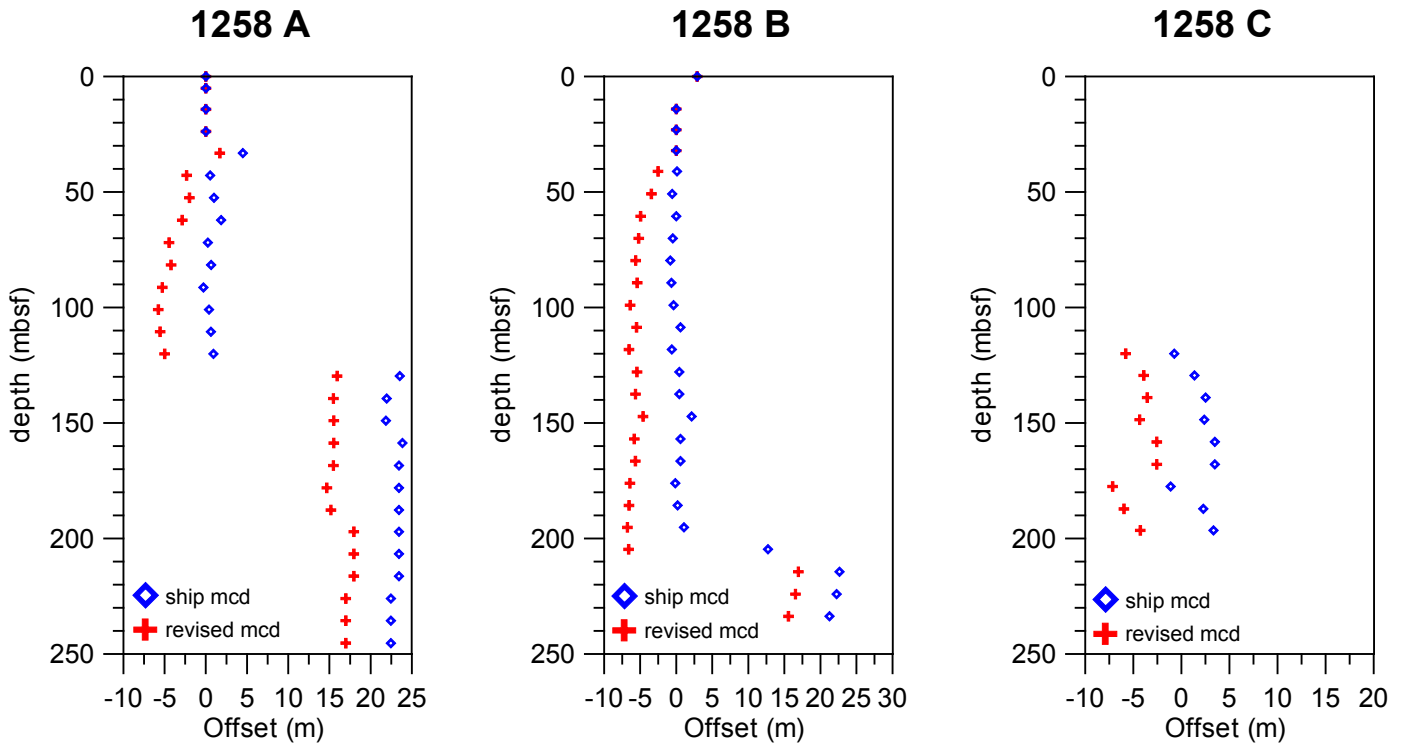

Figure S1. Core offsets between mbsf and ship composite depth (mcd) as well as revised composite depth (rmcd) applied to Holes 1258A, 1258B, and 1258C plotted against meters below seafloor (mbsf). The diamonds mark the applied shipboard offsets and the crosses mark the applied revised offset.

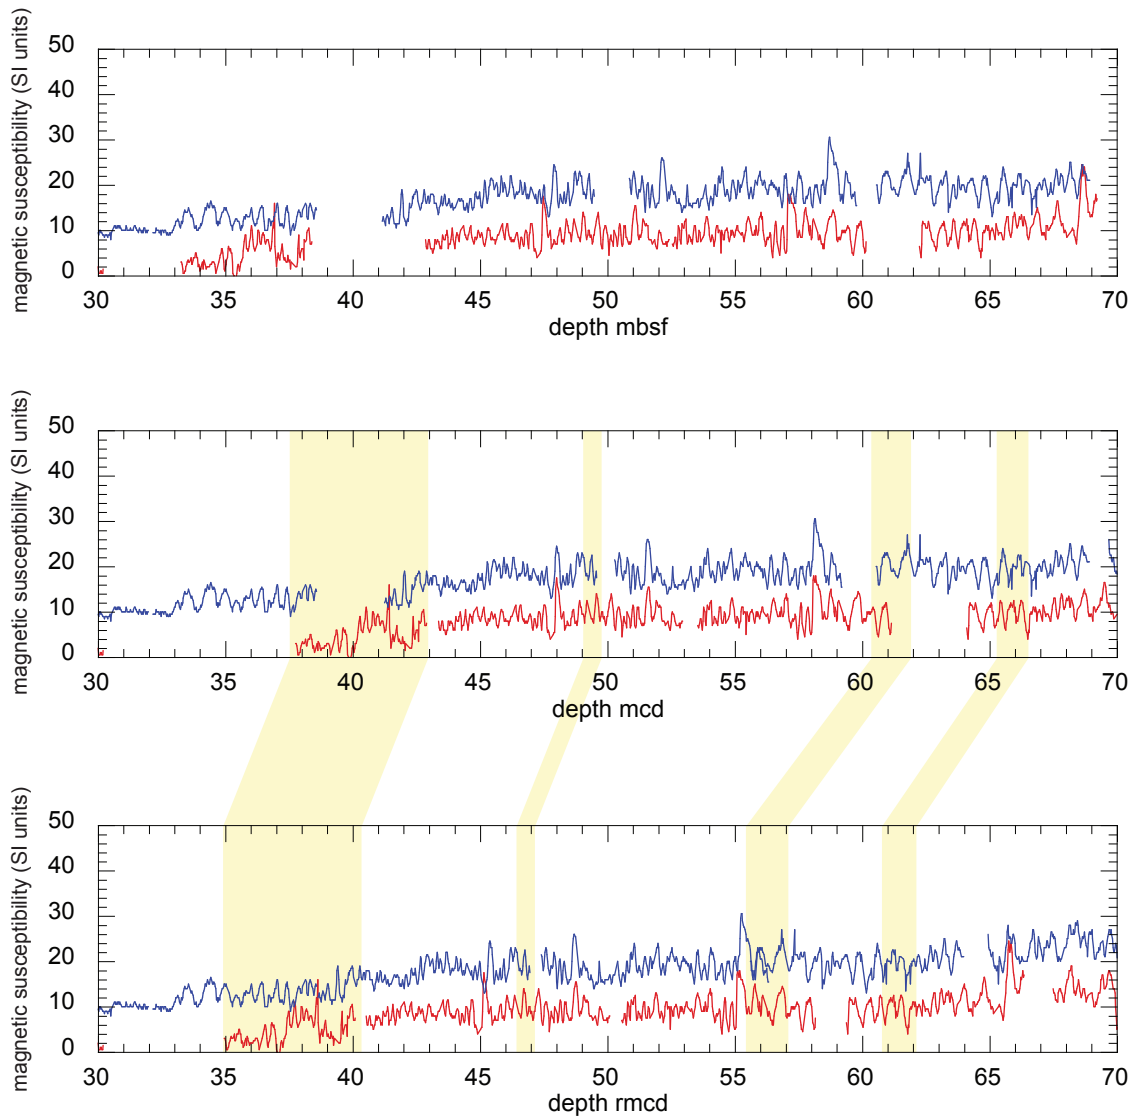

Figure S2A. Magnetic susceptibility (MS) of Holes 1258A (red) and 1258B (blue) plotted along shipboard mbsf (top panel), shipboard composite depth (mcd, middle panel), and revised-composite depth (rmcd, lower panel). The yellow shaded areas highlight major changes between mcd and rmcd. Note: MS values of Hole 1258B are offset by 10 units for clarity.

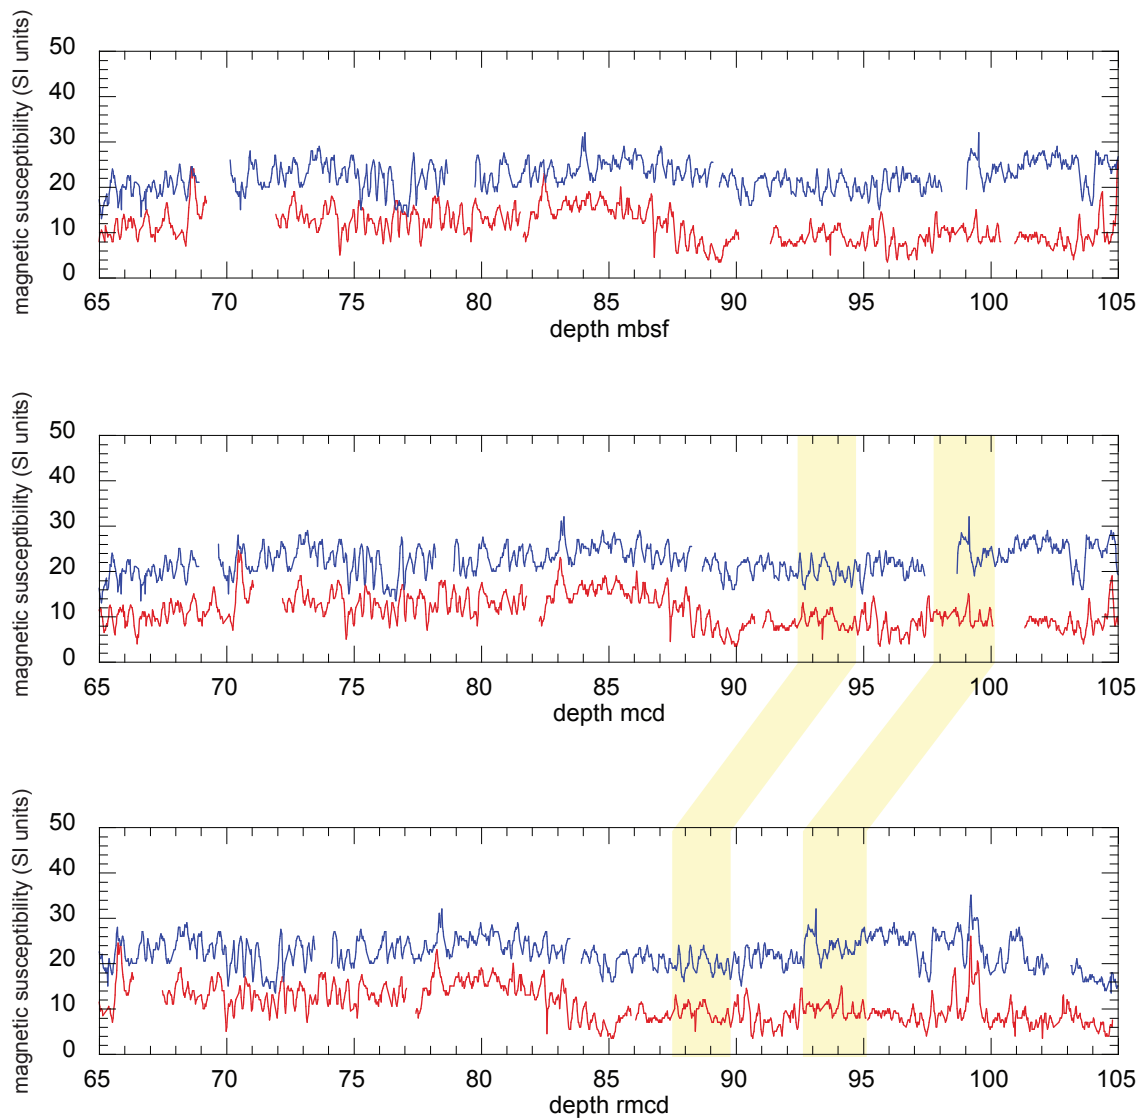

Figure S2B. Magnetic susceptibility (MS) of Holes 1258A (red) and 1258B (blue) plotted along shipboard mbsf (top panel), shipboard composite depth (mcd, middle panel), and revised-composite depth (rmcd, lower panel). The yellow shaded areas highlight major changes between mcd and rmcd. Note: MS values of Hole 1258B are offset by 10 units for clarity.

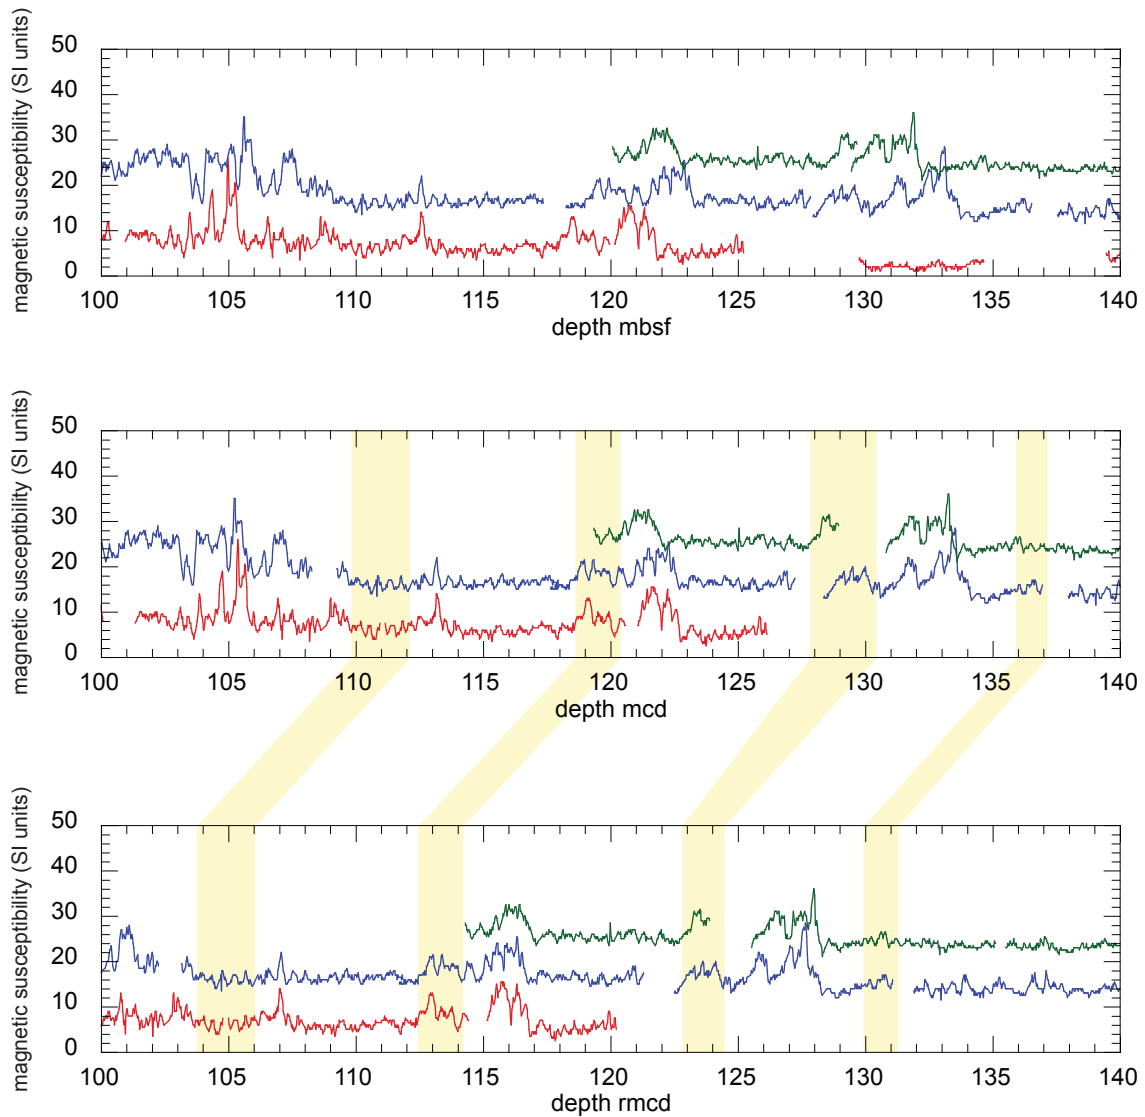

Figure S2C. Magnetic susceptibility (MS) of Holes 1258A (red), 1258 B (blue), and 1258C (green) plotted along shipboard mbsf (top panel), shipboard composite depth (mcd, middle panel), and revised composite depth (rmcd, lower panel). The yellow shaded areas highlight major changes between mcd and rmcd. Note: MS values of Hole 1258B and 1258 C are offset by 10 and 20 units, respectively, for clarity.

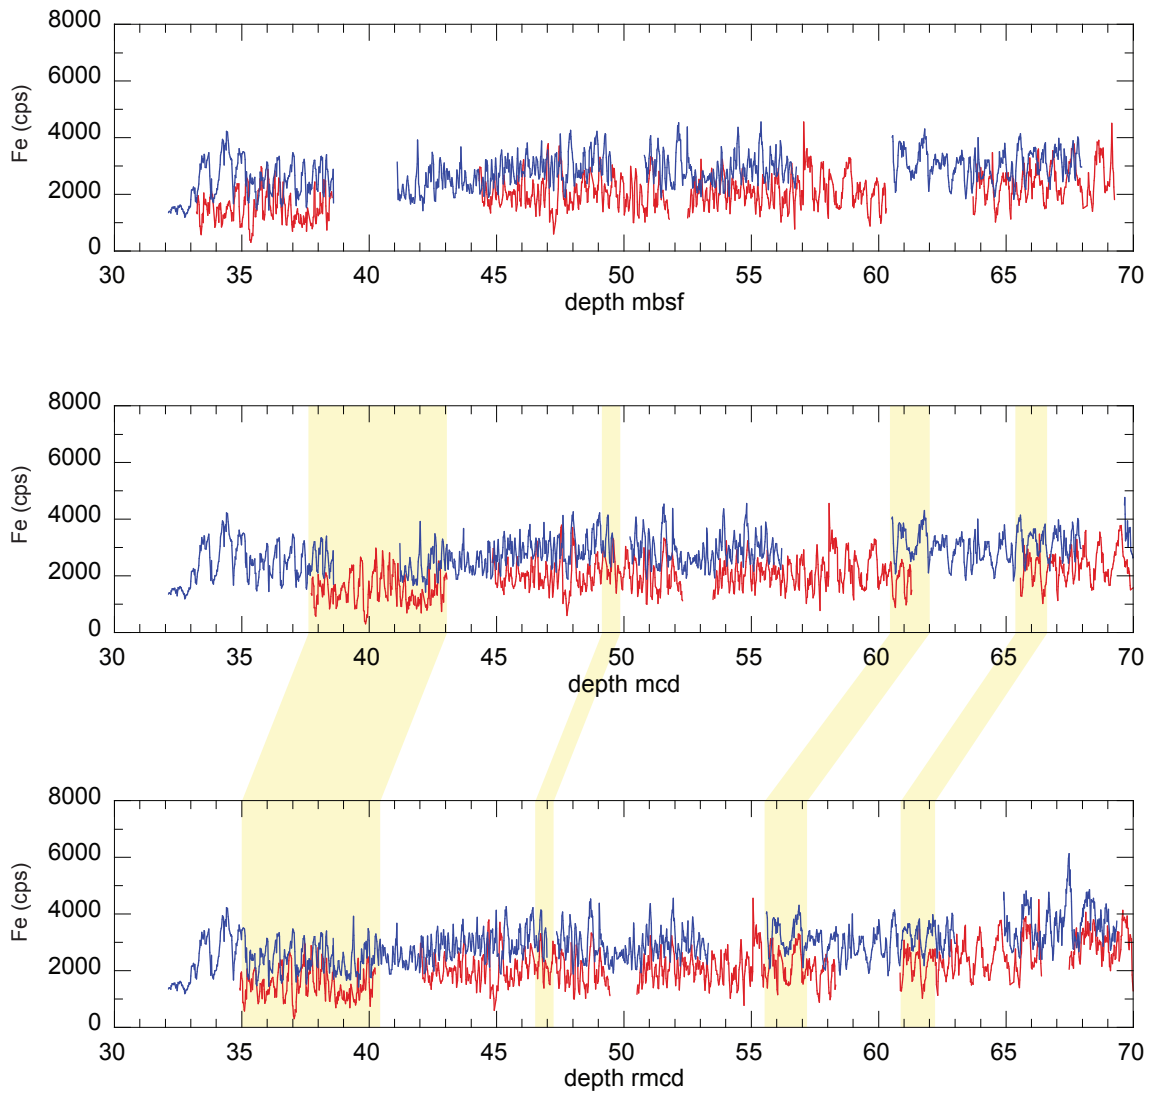

Figure S3A. XRF core scanning iron (Fe) intensity records of Holes 1258A (red) and 1258B (blue) plotted along shipboard mbsf (top panel), shipboard composite depth (mcd, middle panel), and revised composite depth (rmcd, lower panel). The yellow shaded areas highlight major changes between mcd and rmcd. Note: MS values of Hole 1258B are offset by 10 units for clarity.

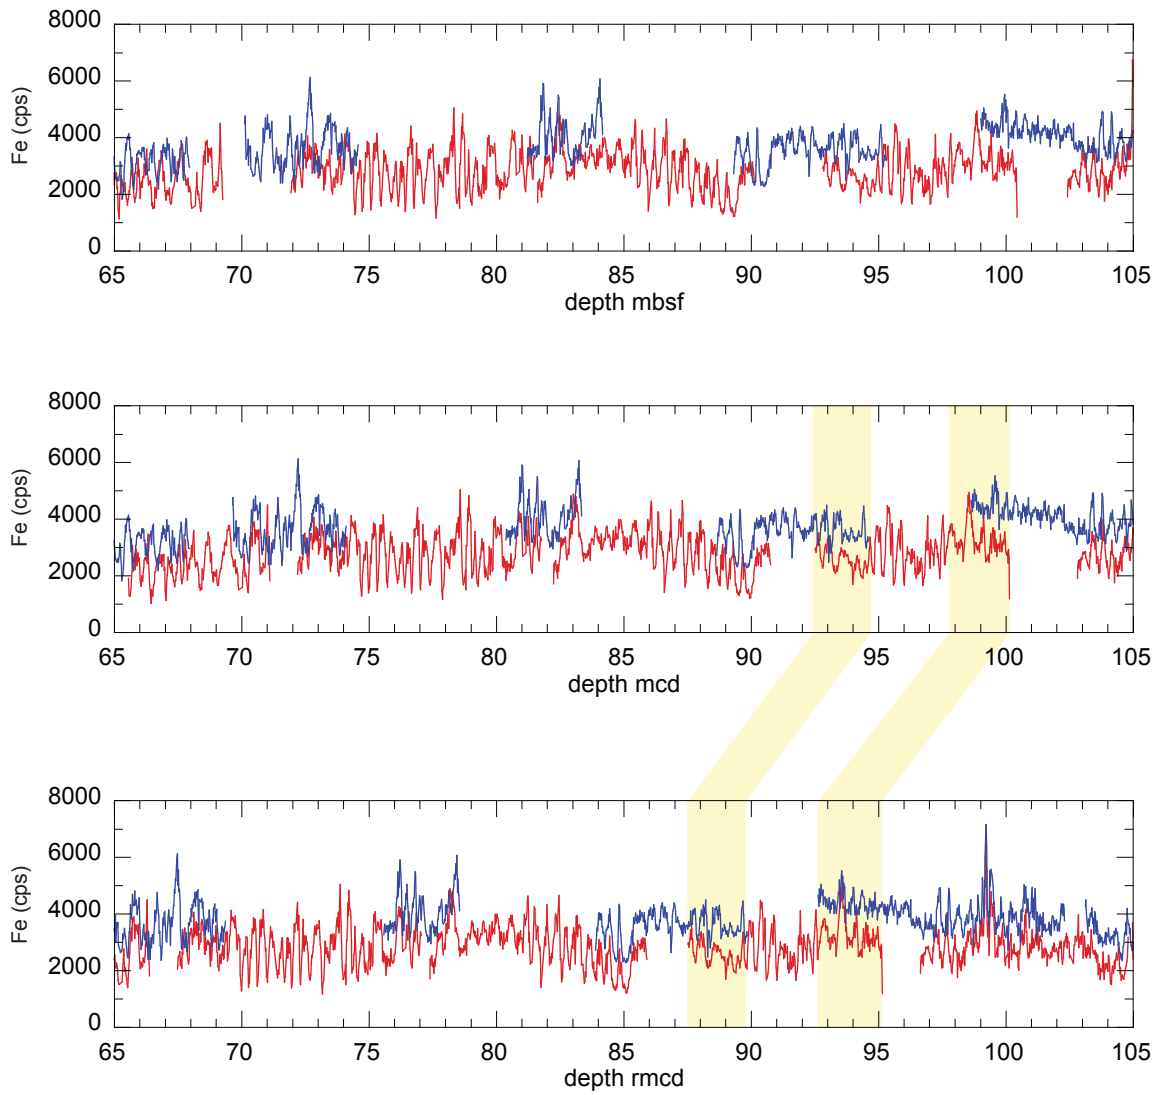

Figure S3B. XRF core scanning iron (Fe) intensity records of Holes 1258A (red) and 1258B (blue) plotted along shipboard mbsf (top panel), shipboard composite depth (mcd, middle panel), and revised composite depth (rmcd, lower panel). The yellow shaded areas highlight major changes between mcd and rmcd. Note: MS values of Hole 1258B are offset by 10 units for clarity.

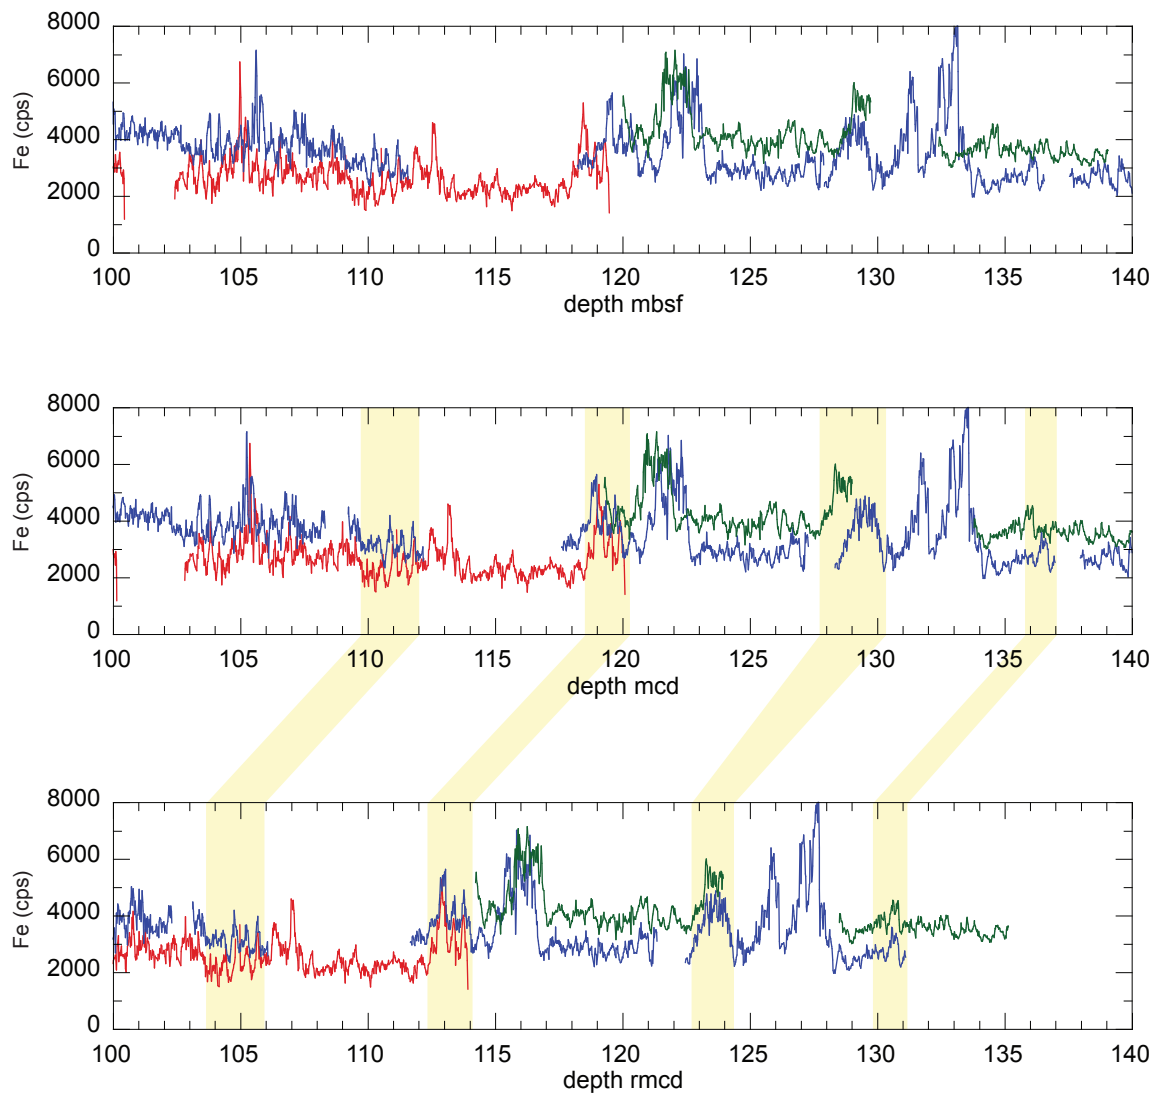

Figure S3C. XRF core scanning iron (Fe) intensity records of Holes 1258A (red), 1258 B (blue), and 1258C (green) plotted along shipboard mbsf (top panel), shipboard composite depth (mcd, middle panel), and revised composite depth (rmcd, lower panel). The yellow shaded areas highlight major changes between mcd and rmcd. Note: MS values of Hole 1258B and 1258 C are offset by 10 and 20 units, respectively, for clarity.

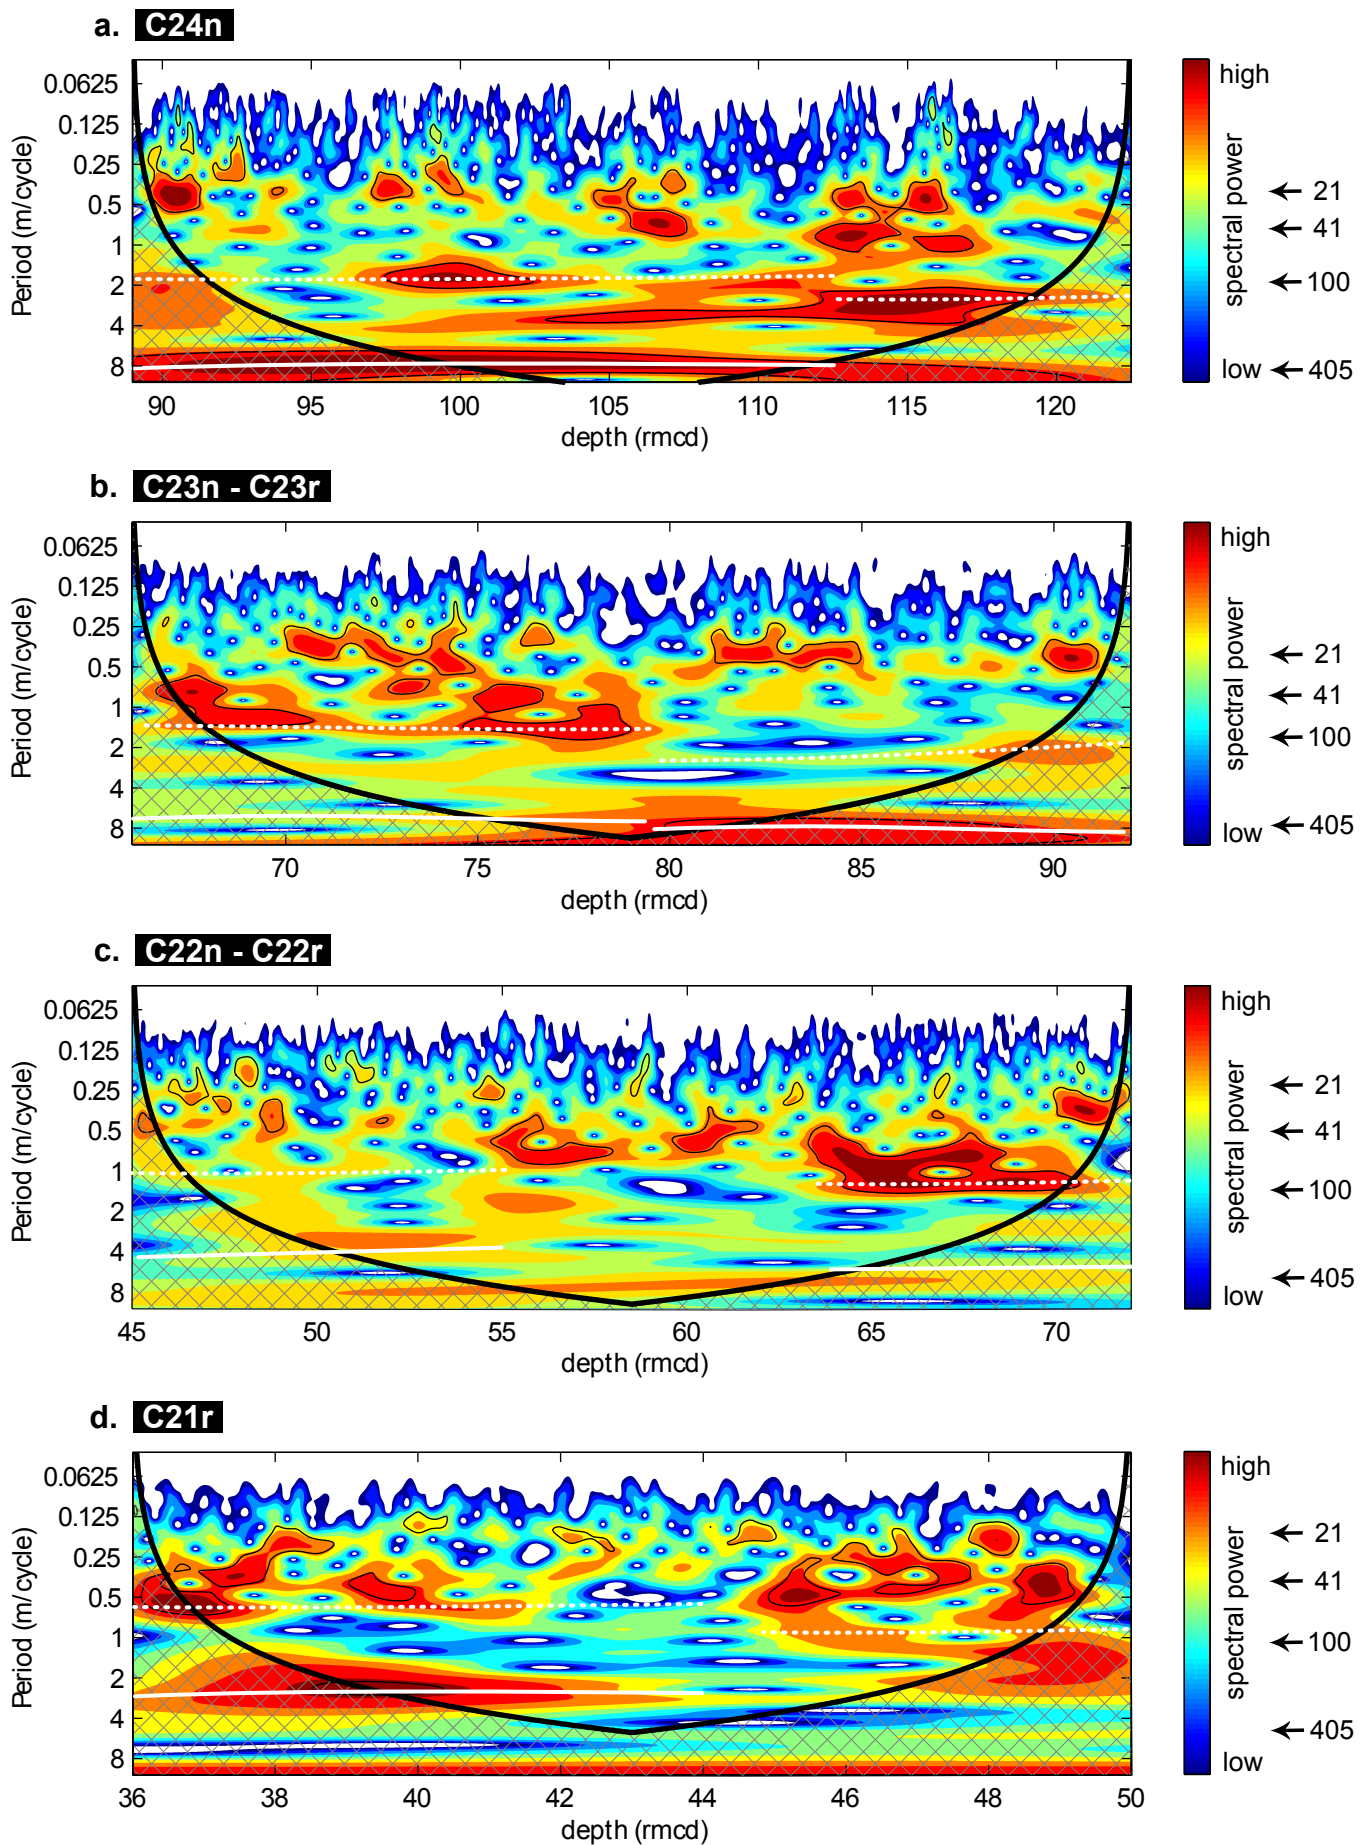

Figure S4. Evolutionary wavelet power spectra and Multi Taper Method (MTM) power spectra of Fe intensity data from ODP Site 1258 for magnetochrons C24n (a), C23 (b), C22 (c) and C21r (d) in the depth domain. The shaded contours in the evolutionary wavelet power spectra are normalized linear variances with blue representing low spectral power, and red representing high spectral power. The black contour lines enclose regions with more than 95% confidence. Cross-hatched regions on either end indicate the cone of influence where edge effects become important. Distinct bands that run across the spectra indicate the dominance of Milankovitch frequencies. Hatched white line is 100-kyr cycle, solid white line is 405-kyr cycle.



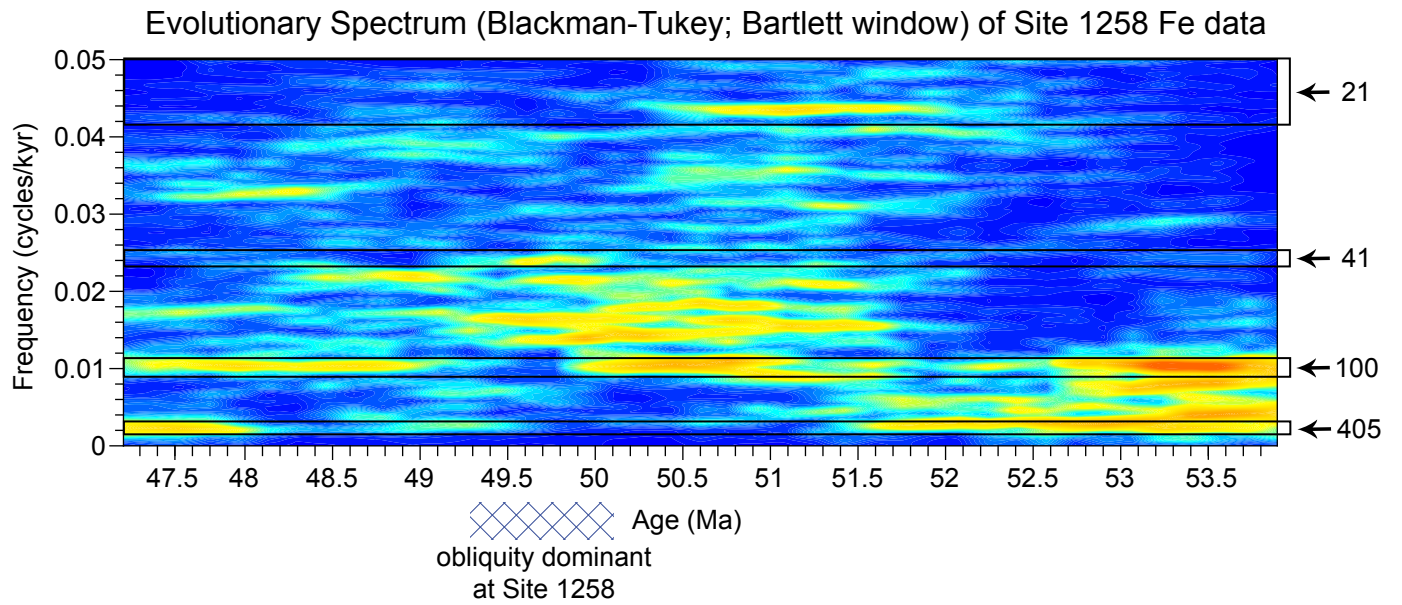

Figure S5. Evolutionary power spectrum (Blackman-Tukey; Bartlett window; length of the running window was 800 kyr, step size 200 kyr) of ODP Site 1258 Fe intensity data. Note the distinct bands that run across the spectra.

Note: only the first page given!

TABLE S1 XRF FE INTENSITIES FROM HOLE 1258A (BREMEN CORE SCANNER XRF1; 20kV; 0.087mA)

| Leg | Site | Hole | Core | Type | Section | Section depth (cm) | Depth (mbsf) | Depth (rmcd) | Fe (cps) | 1258 hole A |
|-----|------|------|------|------|---------|--------------------|--------------|--------------|----------|-------------|
| 207 | 1258 | A    | 5    | R    | 1       | 4                  | 33.24        | 34.94        |          | 1366        |
| 207 | 1258 | A    | 5    | R    | 1       | 6                  | 33.26        | 34.96        |          | 1317        |
| 207 | 1258 | A    | 5    | R    | 1       | 8                  | 33.28        | 34.98        |          | 1886        |
| 207 | 1258 | A    | 5    | R    | 1       | 10                 | 33.30        | 35.00        |          | 1943        |
| 207 | 1258 | A    | 5    | R    | 1       | 12                 | 33.32        | 35.02        |          | 1718        |
| 207 | 1258 | A    | 5    | R    | 1       | 14                 | 33.34        | 35.04        |          | 1627        |
| 207 | 1258 | A    | 5    | R    | 1       | 16                 | 33.36        | 35.06        |          | 858         |
| 207 | 1258 | A    | 5    | R    | 1       | 18                 | 33.38        | 35.08        |          | 878         |
| 207 | 1258 | A    | 5    | R    | 1       | 20                 | 33.40        | 35.10        |          | 619         |
| 207 | 1258 | A    | 5    | R    | 1       | 22                 | 33.42        | 35.12        |          | 569         |
| 207 | 1258 | A    | 5    | R    | 1       | 24                 | 33.44        | 35.14        |          | 854         |
| 207 | 1258 | A    | 5    | R    | 1       | 26                 | 33.46        | 35.16        |          | 1277        |
| 207 | 1258 | A    | 5    | R    | 1       | 29                 | 33.49        | 35.19        |          | 1325        |
| 207 | 1258 | A    | 5    | R    | 1       | 30                 | 33.50        | 35.20        |          | 996         |
| 207 | 1258 | A    | 5    | R    | 1       | 32                 | 33.52        | 35.22        |          | 2038        |
| 207 | 1258 | A    | 5    | R    | 1       | 34                 | 33.54        | 35.24        |          | 1705        |
| 207 | 1258 | A    | 5    | R    | 1       | 36                 | 33.56        | 35.26        |          | 1707        |
| 207 | 1258 | A    | 5    | R    | 1       | 38                 | 33.58        | 35.28        |          | 1626        |
| 207 | 1258 | A    | 5    | R    | 1       | 40                 | 33.60        | 35.30        |          | 1817        |
| 207 | 1258 | A    | 5    | R    | 1       | 42                 | 33.62        | 35.32        |          | 1643        |
| 207 | 1258 | A    | 5    | R    | 1       | 44                 | 33.64        | 35.34        |          | 1588        |
| 207 | 1258 | A    | 5    | R    | 1       | 46                 | 33.66        | 35.36        |          | 1464        |
| 207 | 1258 | A    | 5    | R    | 1       | 48                 | 33.68        | 35.38        |          | 1257        |
| 207 | 1258 | A    | 5    | R    | 1       | 50                 | 33.70        | 35.40        |          | 1696        |
| 207 | 1258 | A    | 5    | R    | 1       | 52                 | 33.72        | 35.42        |          | 1411        |
| 207 | 1258 | A    | 5    | R    | 1       | 54                 | 33.74        | 35.44        |          | 1324        |
| 207 | 1258 | A    | 5    | R    | 1       | 56                 | 33.76        | 35.46        |          | 1881        |
| 207 | 1258 | A    | 5    | R    | 1       | 58                 | 33.78        | 35.48        |          | 1933        |
| 207 | 1258 | A    | 5    | R    | 1       | 59                 | 33.79        | 35.49        |          | 1986        |
| 207 | 1258 | A    | 5    | R    | 1       | 62                 | 33.82        | 35.52        |          | 2099        |
| 207 | 1258 | A    | 5    | R    | 1       | 64                 | 33.84        | 35.54        |          | 1988        |
| 207 | 1258 | A    | 5    | R    | 1       | 66                 | 33.86        | 35.56        |          | 1995        |
| 207 | 1258 | A    | 5    | R    | 1       | 68                 | 33.88        | 35.58        |          | 1861        |
| 207 | 1258 | A    | 5    | R    | 1       | 69                 | 33.89        | 35.59        |          | 1685        |
| 207 | 1258 | A    | 5    | R    | 1       | 75                 | 33.95        | 35.65        |          | 936         |
| 207 | 1258 | A    | 5    | R    | 1       | 76                 | 33.96        | 35.66        |          | 832         |
| 207 | 1258 | A    | 5    | R    | 1       | 78                 | 33.98        | 35.68        |          | 898         |
| 207 | 1258 | A    | 5    | R    | 1       | 80                 | 34.00        | 35.70        |          | 1072        |
| 207 | 1258 | A    | 5    | R    | 1       | 82                 | 34.02        | 35.72        |          | 1266        |
| 207 | 1258 | A    | 5    | R    | 1       | 84                 | 34.04        | 35.74        |          | 1538        |
| 207 | 1258 | A    | 5    | R    | 1       | 86                 | 34.06        | 35.76        |          | 1539        |
| 207 | 1258 | A    | 5    | R    | 1       | 88                 | 34.08        | 35.78        |          | 1511        |
| 207 | 1258 | A    | 5    | R    | 1       | 89                 | 34.09        | 35.79        |          | 1498        |
| 207 | 1258 | A    | 5    | R    | 1       | 91                 | 34.11        | 35.81        |          | 1002        |
| 207 | 1258 | A    | 5    | R    | 1       | 92                 | 34.12        | 35.82        |          | 1573        |
| 207 | 1258 | A    | 5    | R    | 1       | 94                 | 34.14        | 35.84        |          | 1663        |
| 207 | 1258 | A    | 5    | R    | 1       | 96                 | 34.16        | 35.86        |          | 1451        |
| 207 | 1258 | A    | 5    | R    | 1       | 98                 | 34.18        | 35.88        |          | 1684        |
| 207 | 1258 | A    | 5    | R    | 1       | 100                | 34.20        | 35.90        |          | 1329        |
| 207 | 1258 | A    | 5    | R    | 1       | 102                | 34.22        | 35.92        |          | 841         |
| 207 | 1258 | A    | 5    | R    | 1       | 104                | 34.24        | 35.94        |          | 923         |
| 207 | 1258 | A    | 5    | R    | 1       | 106                | 34.26        | 35.96        |          | 956         |
| 207 | 1258 | A    | 5    | R    | 1       | 108                | 34.28        | 35.98        |          | 1264        |
| 207 | 1258 | A    | 5    | R    | 1       | 110                | 34.30        | 36.00        |          | 1209        |
| 207 | 1258 | A    | 5    | R    | 1       | 112                | 34.32        | 36.02        |          | 1143        |
| 207 | 1258 | A    | 5    | R    | 1       | 114                | 34.34        | 36.04        |          | 1311        |
| 207 | 1258 | A    | 5    | R    | 1       | 116                | 34.36        | 36.06        |          | 1311        |
| 207 | 1258 | A    | 5    | R    | 1       | 118                | 34.38        | 36.08        |          | 1170        |
| 207 | 1258 | A    | 5    | R    | 1       | 120                | 34.40        | 36.10        |          | 1348        |
| 207 | 1258 | A    | 5    | R    | 1       | 122                | 34.42        | 36.12        |          | 1562        |
| 207 | 1258 | A    | 5    | R    | 1       | 124                | 34.44        | 36.14        |          | 1471        |
| 207 | 1258 | A    | 5    | R    | 1       | 126                | 34.46        | 36.16        |          | 1637        |
| 207 | 1258 | A    | 5    | R    | 1       | 128                | 34.48        | 36.18        |          | 1593        |
| 207 | 1258 | A    | 5    | R    | 1       | 130                | 34.50        | 36.20        |          | 1710        |
| 207 | 1258 | A    | 5    | R    | 1       | 132                | 34.52        | 36.22        |          | 1750        |
| 207 | 1258 | A    | 5    | R    | 1       | 134                | 34.54        | 36.24        |          | 1758        |
| 207 | 1258 | A    | 5    | R    | 1       | 136                | 34.56        | 36.26        |          | 1568        |
| 207 | 1258 | A    | 5    | R    | 1       | 138                | 34.58        | 36.28        |          | 1417        |
| 207 | 1258 | A    | 5    | R    | 1       | 140                | 34.60        | 36.30        |          | 1417        |
| 207 | 1258 | A    | 5    | R    | 1       | 142                | 34.62        | 36.32        |          | 1052        |
| 207 | 1258 | A    | 5    | R    | 1       | 144                | 34.64        | 36.34        |          | 1333        |
| 207 | 1258 | A    | 5    | R    | 1       | 146                | 34.66        | 36.36        |          | 1342        |
| 207 | 1258 | A    | 5    | R    | 1       | 148                | 34.68        | 36.38        |          | 1063        |
| 207 | 1258 | A    | 5    | R    | 2       | 2                  | 34.72        | 36.42        |          | 1753        |
| 207 | 1258 | A    | 5    | R    | 2       | 4                  | 34.74        | 36.44        |          | 1928        |

Note: only the first page given!

TABLE S2 XRF FE INTENSITIES FROM HOLE 1258B (BREMEN CORE SCANNER XRF1: 20kV: 0.087mA)

| Leg | Site | Hole | Core | Type | Section | Section depth (cm) | Depth (mbsf) | Depth (rmcd) | Fe (cps) | 1258 hole B |
|-----|------|------|------|------|---------|--------------------|--------------|--------------|----------|-------------|
| 207 | 1258 | B    | 4    | R    | 1       | 4                  | 32.14        | 32.14        | 347      |             |
| 207 | 1258 | B    | 4    | R    | 1       | 6                  | 32.16        | 32.16        | 396      |             |
| 207 | 1258 | B    | 4    | R    | 1       | 8                  | 32.18        | 32.18        | 395      |             |
| 207 | 1258 | B    | 4    | R    | 1       | 10                 | 32.20        | 32.20        | 383      |             |
| 207 | 1258 | B    | 4    | R    | 1       | 13                 | 32.23        | 32.23        | 328      |             |
| 207 | 1258 | B    | 4    | R    | 1       | 14                 | 32.24        | 32.24        | 457      |             |
| 207 | 1258 | B    | 4    | R    | 1       | 16                 | 32.26        | 32.26        | 441      |             |
| 207 | 1258 | B    | 4    | R    | 1       | 18                 | 32.28        | 32.28        | 535      |             |
| 207 | 1258 | B    | 4    | R    | 1       | 20                 | 32.30        | 32.30        | 538      |             |
| 207 | 1258 | B    | 4    | R    | 1       | 22                 | 32.32        | 32.32        | 494      |             |
| 207 | 1258 | B    | 4    | R    | 1       | 24                 | 32.34        | 32.34        | 549      |             |
| 207 | 1258 | B    | 4    | R    | 1       | 26                 | 32.36        | 32.36        | 507      |             |
| 207 | 1258 | B    | 4    | R    | 1       | 28                 | 32.38        | 32.38        | 560      |             |
| 207 | 1258 | B    | 4    | R    | 1       | 30                 | 32.40        | 32.40        | 489      |             |
| 207 | 1258 | B    | 4    | R    | 1       | 32                 | 32.42        | 32.42        | 377      |             |
| 207 | 1258 | B    | 4    | R    | 1       | 34                 | 32.44        | 32.44        | 403      |             |
| 207 | 1258 | B    | 4    | R    | 1       | 36                 | 32.46        | 32.46        | 495      |             |
| 207 | 1258 | B    | 4    | R    | 1       | 38                 | 32.48        | 32.48        | 287      |             |
| 207 | 1258 | B    | 4    | R    | 1       | 40                 | 32.50        | 32.50        | 480      |             |
| 207 | 1258 | B    | 4    | R    | 1       | 42                 | 32.52        | 32.52        | 580      |             |
| 207 | 1258 | B    | 4    | R    | 1       | 44                 | 32.54        | 32.54        | 529      |             |
| 207 | 1258 | B    | 4    | R    | 1       | 46                 | 32.56        | 32.56        | 533      |             |
| 207 | 1258 | B    | 4    | R    | 1       | 48                 | 32.58        | 32.58        | 590      |             |
| 207 | 1258 | B    | 4    | R    | 1       | 50                 | 32.60        | 32.60        | 617      |             |
| 207 | 1258 | B    | 4    | R    | 1       | 52                 | 32.62        | 32.62        | 568      |             |
| 207 | 1258 | B    | 4    | R    | 1       | 54                 | 32.64        | 32.64        | 574      |             |
| 207 | 1258 | B    | 4    | R    | 1       | 56                 | 32.66        | 32.66        | 470      |             |
| 207 | 1258 | B    | 4    | R    | 1       | 58                 | 32.68        | 32.68        | 489      |             |
| 207 | 1258 | B    | 4    | R    | 1       | 60                 | 32.70        | 32.70        | 450      |             |
| 207 | 1258 | B    | 4    | R    | 1       | 62                 | 32.72        | 32.72        | 384      |             |
| 207 | 1258 | B    | 4    | R    | 1       | 64                 | 32.74        | 32.74        | 337      |             |
| 207 | 1258 | B    | 4    | R    | 1       | 66                 | 32.76        | 32.76        | 374      |             |
| 207 | 1258 | B    | 4    | R    | 1       | 68                 | 32.78        | 32.78        | 182      |             |
| 207 | 1258 | B    | 4    | R    | 1       | 70                 | 32.80        | 32.80        | 218      |             |
| 207 | 1258 | B    | 4    | R    | 1       | 72                 | 32.82        | 32.82        | 300      |             |
| 207 | 1258 | B    | 4    | R    | 1       | 74                 | 32.84        | 32.84        | 329      |             |
| 207 | 1258 | B    | 4    | R    | 1       | 76                 | 32.86        | 32.86        | 304      |             |
| 207 | 1258 | B    | 4    | R    | 1       | 78                 | 32.88        | 32.88        | 344      |             |
| 207 | 1258 | B    | 4    | R    | 1       | 80                 | 32.90        | 32.90        | 460      |             |
| 207 | 1258 | B    | 4    | R    | 1       | 82                 | 32.92        | 32.92        | 437      |             |
| 207 | 1258 | B    | 4    | R    | 1       | 84                 | 32.94        | 32.94        | 570      |             |
| 207 | 1258 | B    | 4    | R    | 1       | 86                 | 32.96        | 32.96        | 510      |             |
| 207 | 1258 | B    | 4    | R    | 1       | 88                 | 32.98        | 32.98        | 540      |             |
| 207 | 1258 | B    | 4    | R    | 1       | 90                 | 33.00        | 33.00        | 569      |             |
| 207 | 1258 | B    | 4    | R    | 1       | 92                 | 33.02        | 33.02        | 809      |             |
| 207 | 1258 | B    | 4    | R    | 1       | 94                 | 33.04        | 33.04        | 1147     |             |
| 207 | 1258 | B    | 4    | R    | 1       | 96                 | 33.06        | 33.06        | 1143     |             |
| 207 | 1258 | B    | 4    | R    | 1       | 98                 | 33.08        | 33.08        | 1170     |             |
| 207 | 1258 | B    | 4    | R    | 1       | 100                | 33.10        | 33.10        | 1137     |             |
| 207 | 1258 | B    | 4    | R    | 1       | 102                | 33.12        | 33.12        | 1252     |             |
| 207 | 1258 | B    | 4    | R    | 1       | 104                | 33.14        | 33.14        | 1174     |             |
| 207 | 1258 | B    | 4    | R    | 1       | 106                | 33.16        | 33.16        | 1032     |             |
| 207 | 1258 | B    | 4    | R    | 1       | 108                | 33.18        | 33.18        | 1209     |             |
| 207 | 1258 | B    | 4    | R    | 1       | 110                | 33.20        | 33.20        | 748      |             |
| 207 | 1258 | B    | 4    | R    | 1       | 112                | 33.22        | 33.22        | 874      |             |
| 207 | 1258 | B    | 4    | R    | 1       | 114                | 33.24        | 33.24        | 700      |             |
| 207 | 1258 | B    | 4    | R    | 1       | 116                | 33.26        | 33.26        | 954      |             |
| 207 | 1258 | B    | 4    | R    | 1       | 118                | 33.28        | 33.28        | 1099     |             |
| 207 | 1258 | B    | 4    | R    | 1       | 120                | 33.30        | 33.30        | 1183     |             |
| 207 | 1258 | B    | 4    | R    | 1       | 122                | 33.32        | 33.32        | 1359     |             |
| 207 | 1258 | B    | 4    | R    | 1       | 124                | 33.34        | 33.34        | 1605     |             |
| 207 | 1258 | B    | 4    | R    | 1       | 126                | 33.36        | 33.36        | 1810     |             |
| 207 | 1258 | B    | 4    | R    | 1       | 128                | 33.38        | 33.38        | 2060     |             |
| 207 | 1258 | B    | 4    | R    | 1       | 130                | 33.40        | 33.40        | 1870     |             |
| 207 | 1258 | B    | 4    | R    | 1       | 132                | 33.42        | 33.42        | 1953     |             |
| 207 | 1258 | B    | 4    | R    | 1       | 134                | 33.44        | 33.44        | 2349     |             |
| 207 | 1258 | B    | 4    | R    | 1       | 136                | 33.46        | 33.46        | 2156     |             |
| 207 | 1258 | B    | 4    | R    | 1       | 138                | 33.48        | 33.48        | 2250     |             |
| 207 | 1258 | B    | 4    | R    | 1       | 140                | 33.50        | 33.50        | 2113     |             |
| 207 | 1258 | B    | 4    | R    | 1       | 142                | 33.52        | 33.52        | 2244     |             |
| 207 | 1258 | B    | 4    | R    | 1       | 144                | 33.54        | 33.54        | 2408     |             |
| 207 | 1258 | B    | 4    | R    | 1       | 146                | 33.56        | 33.56        | 2383     |             |
| 207 | 1258 | B    | 4    | R    | 1       | 148                | 33.58        | 33.58        | 1949     |             |
| 207 | 1258 | B    | 4    | R    | 2       | 2                  | 33.62        | 33.62        | 1937     |             |
| 207 | 1258 | B    | 4    | R    | 2       | 4                  | 33.64        | 33.64        | 2172     |             |

Note: only the first page given!

TABLE S3 XRF FE INTENSITIES FROM HOLE 1258C (BREMEN CORE SCANNER XRF1: 20kV: 0.087mA)

| Leg | Site | Hole | Core | Type | Section | Section depth (cm) | Depth (mbsf) | Depth (rmcd) | Fe (cps) | 1258 hole C |
|-----|------|------|------|------|---------|--------------------|--------------|--------------|----------|-------------|
| 207 | 1258 | C    | 1    | R    | 1       | 2                  | 120.02       | 114.23       |          | 3174        |
| 207 | 1258 | C    | 1    | R    | 1       | 4                  | 120.04       | 114.25       |          | 3530        |
| 207 | 1258 | C    | 1    | R    | 1       | 6                  | 120.06       | 114.27       |          | 3249        |
| 207 | 1258 | C    | 1    | R    | 1       | 8                  | 120.08       | 114.29       |          | 3126        |
| 207 | 1258 | C    | 1    | R    | 1       | 10                 | 120.10       | 114.31       |          | 3038        |
| 207 | 1258 | C    | 1    | R    | 1       | 12                 | 120.12       | 114.33       |          | 2656        |
| 207 | 1258 | C    | 1    | R    | 1       | 14                 | 120.14       | 114.35       |          | 2589        |
| 207 | 1258 | C    | 1    | R    | 1       | 16                 | 120.16       | 114.37       |          | 2693        |
| 207 | 1258 | C    | 1    | R    | 1       | 18                 | 120.18       | 114.39       |          | 2605        |
| 207 | 1258 | C    | 1    | R    | 1       | 20                 | 120.20       | 114.41       |          | 2598        |
| 207 | 1258 | C    | 1    | R    | 1       | 22                 | 120.22       | 114.43       |          | 2394        |
| 207 | 1258 | C    | 1    | R    | 1       | 24                 | 120.24       | 114.45       |          | 2410        |
| 207 | 1258 | C    | 1    | R    | 1       | 26                 | 120.26       | 114.47       |          | 2254        |
| 207 | 1258 | C    | 1    | R    | 1       | 28                 | 120.28       | 114.49       |          | 2124        |
| 207 | 1258 | C    | 1    | R    | 1       | 30                 | 120.30       | 114.51       |          | 1927        |
| 207 | 1258 | C    | 1    | R    | 1       | 32                 | 120.32       | 114.53       |          | 1761        |
| 207 | 1258 | C    | 1    | R    | 1       | 34                 | 120.34       | 114.55       |          | 1699        |
| 207 | 1258 | C    | 1    | R    | 1       | 36                 | 120.36       | 114.57       |          | 1643        |
| 207 | 1258 | C    | 1    | R    | 1       | 38                 | 120.38       | 114.59       |          | 1559        |
| 207 | 1258 | C    | 1    | R    | 1       | 40                 | 120.40       | 114.61       |          | 1796        |
| 207 | 1258 | C    | 1    | R    | 1       | 42                 | 120.42       | 114.63       |          | 1869        |
| 207 | 1258 | C    | 1    | R    | 1       | 44                 | 120.44       | 114.65       |          | 1867        |
| 207 | 1258 | C    | 1    | R    | 1       | 46                 | 120.46       | 114.67       |          | 1817        |
| 207 | 1258 | C    | 1    | R    | 1       | 48                 | 120.48       | 114.69       |          | 2090        |
| 207 | 1258 | C    | 1    | R    | 1       | 50                 | 120.50       | 114.71       |          | 2125        |
| 207 | 1258 | C    | 1    | R    | 1       | 52                 | 120.52       | 114.73       |          | 2207        |
| 207 | 1258 | C    | 1    | R    | 1       | 54                 | 120.54       | 114.75       |          | 2251        |
| 207 | 1258 | C    | 1    | R    | 1       | 56                 | 120.56       | 114.77       |          | 2520        |
| 207 | 1258 | C    | 1    | R    | 1       | 58                 | 120.58       | 114.79       |          | 2493        |
| 207 | 1258 | C    | 1    | R    | 1       | 60                 | 120.60       | 114.81       |          | 2024        |
| 207 | 1258 | C    | 1    | R    | 1       | 62                 | 120.62       | 114.83       |          | 2226        |
| 207 | 1258 | C    | 1    | R    | 1       | 64                 | 120.64       | 114.85       |          | 2418        |
| 207 | 1258 | C    | 1    | R    | 1       | 66                 | 120.66       | 114.87       |          | 2417        |
| 207 | 1258 | C    | 1    | R    | 1       | 68                 | 120.68       | 114.89       |          | 2419        |
| 207 | 1258 | C    | 1    | R    | 1       | 70                 | 120.70       | 114.91       |          | 2334        |
| 207 | 1258 | C    | 1    | R    | 1       | 72                 | 120.72       | 114.93       |          | 2510        |
| 207 | 1258 | C    | 1    | R    | 1       | 74                 | 120.74       | 114.95       |          | 2284        |
| 207 | 1258 | C    | 1    | R    | 1       | 76                 | 120.76       | 114.97       |          | 2284        |
| 207 | 1258 | C    | 1    | R    | 1       | 78                 | 120.78       | 114.99       |          | 2376        |
| 207 | 1258 | C    | 1    | R    | 1       | 80                 | 120.80       | 115.01       |          | 2172        |
| 207 | 1258 | C    | 1    | R    | 1       | 82                 | 120.82       | 115.03       |          | 2109        |
| 207 | 1258 | C    | 1    | R    | 1       | 84                 | 120.84       | 115.05       |          | 1799        |
| 207 | 1258 | C    | 1    | R    | 1       | 86                 | 120.86       | 115.07       |          | 2006        |
| 207 | 1258 | C    | 1    | R    | 1       | 88                 | 120.88       | 115.09       |          | 1906        |
| 207 | 1258 | C    | 1    | R    | 1       | 90                 | 120.90       | 115.11       |          | 1879        |
| 207 | 1258 | C    | 1    | R    | 1       | 92                 | 120.92       | 115.13       |          | 1998        |
| 207 | 1258 | C    | 1    | R    | 1       | 94                 | 120.94       | 115.15       |          | 1955        |
| 207 | 1258 | C    | 1    | R    | 1       | 96                 | 120.96       | 115.17       |          | 1839        |
| 207 | 1258 | C    | 1    | R    | 1       | 98                 | 120.98       | 115.19       |          | 1805        |
| 207 | 1258 | C    | 1    | R    | 1       | 100                | 121.00       | 115.21       |          | 1353        |
| 207 | 1258 | C    | 1    | R    | 1       | 102                | 121.02       | 115.23       |          | 1713        |
| 207 | 1258 | C    | 1    | R    | 1       | 104                | 121.04       | 115.25       |          | 2089        |
| 207 | 1258 | C    | 1    | R    | 1       | 106                | 121.06       | 115.27       |          | 1833        |
| 207 | 1258 | C    | 1    | R    | 1       | 108                | 121.08       | 115.29       |          | 1924        |
| 207 | 1258 | C    | 1    | R    | 1       | 110                | 121.10       | 115.31       |          | 2087        |
| 207 | 1258 | C    | 1    | R    | 1       | 112                | 121.12       | 115.33       |          | 2123        |
| 207 | 1258 | C    | 1    | R    | 1       | 114                | 121.14       | 115.35       |          | 2033        |
| 207 | 1258 | C    | 1    | R    | 1       | 116                | 121.16       | 115.37       |          | 2267        |
| 207 | 1258 | C    | 1    | R    | 1       | 118                | 121.18       | 115.39       |          | 2273        |
| 207 | 1258 | C    | 1    | R    | 1       | 119                | 121.19       | 115.40       |          | 2204        |
| 207 | 1258 | C    | 1    | R    | 1       | 122                | 121.22       | 115.43       |          | 2100        |
| 207 | 1258 | C    | 1    | R    | 1       | 124                | 121.24       | 115.45       |          | 2693        |
| 207 | 1258 | C    | 1    | R    | 1       | 126                | 121.26       | 115.47       |          | 2877        |
| 207 | 1258 | C    | 1    | R    | 1       | 128                | 121.28       | 115.49       |          | 2901        |
| 207 | 1258 | C    | 1    | R    | 1       | 130                | 121.30       | 115.51       |          | 3103        |
| 207 | 1258 | C    | 1    | R    | 1       | 132                | 121.32       | 115.53       |          | 3256        |
| 207 | 1258 | C    | 1    | R    | 1       | 134                | 121.34       | 115.55       |          | 2798        |
| 207 | 1258 | C    | 1    | R    | 1       | 136                | 121.36       | 115.57       |          | 2534        |
| 207 | 1258 | C    | 1    | R    | 1       | 138                | 121.38       | 115.59       |          | 2560        |
| 207 | 1258 | C    | 1    | R    | 1       | 140                | 121.40       | 115.61       |          | 2544        |
| 207 | 1258 | C    | 1    | R    | 1       | 142                | 121.42       | 115.63       |          | 2430        |
| 207 | 1258 | C    | 1    | R    | 1       | 144                | 121.44       | 115.65       |          | 2043        |
| 207 | 1258 | C    | 1    | R    | 1       | 146                | 121.46       | 115.67       |          | 2635        |
| 207 | 1258 | C    | 1    | R    | 1       | 148                | 121.48       | 115.69       |          | 2478        |
| 207 | 1258 | C    | 1    | R    | 2       | 3                  | 121.53       | 115.74       |          | 2812        |

TABLE S4 OFFSETS APPLIED TO CORES FROM HOLES 1258A, 1258B AND 1258C

| Core       | Depth (mbsf) | Offset (m)   | Depth (rmcd)  | Depth shifted | Core       | Depth (mbsf) | Offset (m)   | Depth (rmcd)  | Depth shifted |
|------------|--------------|--------------|---------------|---------------|------------|--------------|--------------|---------------|---------------|
| 207-1258A- |              |              |               |               | 18 R       | 166.50       | -5.67        | <b>160.83</b> | y             |
| 1 R        | 0.00         | 0.00         | 0.00          | n             | 19 R       | 176.10       | -6.42        | <b>169.68</b> | y             |
| 2 R        | 5.10         | 0.00         | 5.10          | n             | 20 R       | 185.70       | -5.40        | <b>180.30</b> | y             |
| 3 R        | 14.20        | 0.00         | 14.20         | n             | 21 R       | 195.20       | -6.77        | <b>188.43</b> | y             |
| 4 R        | 23.80        | 0.00         | 23.80         | n             | 22 R       | 204.70       | -6.60        | <b>198.10</b> | y             |
| 5 R        | 33.20        | <b>1.70</b>  | <b>34.90</b>  | y             | 23 R       | 214.40       | <b>16.94</b> | <b>231.34</b> | y             |
| 6 R        | 42.80        | <b>-2.33</b> | <b>40.47</b>  | y             | 24 R       | 224.10       | <b>16.54</b> | <b>240.64</b> | y             |
| 7 R        | 52.50        | <b>-1.99</b> | <b>50.51</b>  | y             | 25 R       | 233.70       | <b>15.56</b> | <b>249.26</b> | y             |
| 8 R        | 62.20        | <b>-2.87</b> | <b>59.33</b>  | y             | 27 R       | 252.90       | <b>17.74</b> | <b>270.64</b> | n             |
| 9 R        | 71.90        | <b>-4.46</b> | <b>67.44</b>  | y             | 28 R       | 258.60       | <b>13.59</b> | <b>272.19</b> | y             |
| 10 R       | 81.60        | <b>-4.22</b> | <b>77.38</b>  | y             | 29 R       | 262.60       | <b>20.79</b> | <b>283.39</b> | y             |
| 11 R       | 91.30        | <b>-5.29</b> | <b>86.01</b>  | y             | 30 R       | 272.20       | <b>15.81</b> | <b>288.01</b> | y             |
| 12 R       | 100.90       | <b>-5.77</b> | <b>95.13</b>  | y             | 31 R       | 281.90       | <b>17.45</b> | <b>299.35</b> | y             |
| 13 R       | 110.50       | <b>-5.55</b> | <b>104.95</b> | y             | 32 R       | 291.50       | <b>16.72</b> | <b>308.22</b> | y             |
| 14 R       | 120.10       | <b>-5.00</b> | <b>115.10</b> | y             | 33 R       | 301.10       | <b>17.12</b> | <b>318.22</b> | y             |
| 15 R       | 129.70       | <b>15.93</b> | <b>145.63</b> | y             | 34 R       | 310.80       | <b>14.50</b> | <b>325.30</b> | y             |
| 16 R       | 139.40       | <b>15.48</b> | <b>154.88</b> | y             | 35 R       | 320.40       | <b>14.70</b> | <b>335.10</b> | y             |
| 17 R       | 149.00       | <b>15.53</b> | <b>164.53</b> | y             | 36 R       | 330.10       | <b>7.12</b>  | <b>337.22</b> | y             |
| 18 R       | 158.70       | <b>15.53</b> | <b>174.23</b> | y             | 38 R       | 349.30       | <b>12.40</b> | <b>361.70</b> | y             |
| 19 R       | 168.40       | <b>15.48</b> | <b>183.88</b> | y             | 39 R       | 359.00       | <b>12.06</b> | <b>371.06</b> | y             |
| 20 R       | 178.10       | <b>14.68</b> | <b>192.78</b> | y             | 40 R       | 368.60       | <b>16.42</b> | <b>385.02</b> | n             |
| 21 R       | 187.70       | <b>15.18</b> | <b>202.88</b> | y             | 42 R       | 383.80       | <b>16.42</b> | <b>400.22</b> | n             |
| 22 R       | 197.10       | <b>17.96</b> | <b>215.06</b> | n             | 43 R       | 387.80       | <b>16.42</b> | <b>404.22</b> | n             |
| 23 R       | 206.70       | <b>17.96</b> | <b>224.66</b> | n             | 44 R       | 393.50       | <b>14.81</b> | <b>408.31</b> | y             |
| 24 R       | 216.30       | <b>17.96</b> | <b>234.26</b> | n             | 45 R       | 397.50       | <b>15.14</b> | <b>412.64</b> | y             |
| 25 R       | 226.00       | <b>16.98</b> | <b>242.98</b> | n             | 46 R       | 403.10       | <b>16.37</b> | <b>419.47</b> | y             |
| 26 R       | 235.60       | <b>16.98</b> | <b>252.58</b> | n             | 47 R       | 407.10       | <b>16.37</b> | <b>423.47</b> | n             |
| 27 R       | 245.30       | <b>16.98</b> | <b>262.28</b> | n             | 48 R       | 412.70       | <b>16.37</b> | <b>429.07</b> | n             |
| 28 R       | 254.90       | <b>16.98</b> | <b>271.88</b> | n             | 49 R       | 416.70       | <b>16.37</b> | <b>433.07</b> | n             |
| 29 R       | 264.60       | <b>16.98</b> | <b>281.58</b> | n             | 50 R       | 422.30       | <b>15.49</b> | <b>437.79</b> | y             |
| 30 R       | 274.20       | <b>16.90</b> | <b>291.10</b> | y             | 51 R       | 426.30       | <b>18.63</b> | <b>444.93</b> | y             |
| 31 R       | 283.90       | <b>17.27</b> | <b>301.17</b> | n             | 52 R       | 431.90       | <b>18.63</b> | <b>450.53</b> | n             |
| 32 R       | 293.50       | <b>17.74</b> | <b>311.24</b> | y             | 53 R       | 435.90       | <b>18.95</b> | <b>454.85</b> | y             |
| 33 R       | 303.10       | <b>16.64</b> | <b>319.74</b> | y             | 54 R       | 441.50       | <b>18.79</b> | <b>460.29</b> | y             |
| 34 R       | 312.80       | <b>19.42</b> | <b>332.22</b> | y             | 55 R       | 445.50       | <b>21.17</b> | <b>466.67</b> | y             |
| 35 R       | 322.40       | <b>17.40</b> | <b>339.80</b> | n             | 56 R       | 451.20       | <b>18.88</b> | <b>470.08</b> | y             |
| 36 R       | 332.00       | <b>17.40</b> | <b>349.40</b> | n             | 57 R       | 455.20       | <b>18.88</b> | <b>474.08</b> | n             |
| 37 R       | 341.70       | <b>17.40</b> | <b>359.10</b> | n             | 207-1258C- |              |              |               |               |
| 38 R       | 351.30       | <b>17.40</b> | <b>368.70</b> | n             | 1 R        | 120.00       | -5.79        | <b>114.21</b> | y             |
| 39 R       | 360.90       | <b>15.27</b> | <b>376.17</b> | y             | 2 R        | 129.40       | -3.91        | <b>125.49</b> | y             |
| 40 R       | 370.50       | <b>18.46</b> | <b>388.96</b> | n             | 3 R        | 139.00       | -3.55        | <b>135.45</b> | y             |
| 41 R       | 380.20       | <b>18.46</b> | <b>398.66</b> | n             | 4 R        | 148.60       | -4.34        | <b>144.26</b> | y             |
| 42 R       | 389.80       | <b>19.48</b> | <b>409.28</b> | y             | 5 R        | 158.20       | -2.56        | <b>155.64</b> | n             |
| 43 R       | 399.40       | <b>19.41</b> | <b>418.81</b> | n             | 6 R        | 167.90       | -2.56        | <b>165.34</b> | n             |
| 44 R       | 409.10       | <b>19.41</b> | <b>428.51</b> | n             | 7 R        | 177.50       | -7.15        | <b>170.35</b> | y             |
| 45 R       | 418.70       | <b>19.41</b> | <b>438.11</b> | n             | 8 R        | 187.20       | -5.97        | <b>181.23</b> | y             |
| 46 R       | 423.30       | <b>19.41</b> | <b>442.71</b> | n             | 9 R        | 196.50       | -4.27        | <b>192.23</b> | y             |
| 47 R       | 428.30       | <b>22.15</b> | <b>450.45</b> | y             | 12 R       | 254.90       | <b>11.51</b> | <b>266.41</b> | y             |
| 48 R       | 432.90       | <b>22.45</b> | <b>455.35</b> | y             | 14 R       | 384.80       | <b>10.97</b> | <b>395.77</b> | n             |
| 49 R       | 437.90       | <b>22.45</b> | <b>460.35</b> | n             | 15 R       | 389.80       | <b>20.01</b> | <b>409.81</b> | y             |
| 50 R       | 442.50       | <b>31.32</b> | <b>473.82</b> | y             | 16 R       | 394.40       | <b>23.41</b> | <b>417.81</b> | y             |
| 207-1258B- |              |              |               |               | 17 R       | 399.40       | <b>24.47</b> | <b>423.87</b> | y             |
| 1 R        | 0.00         | 2.90         | 2.90          | y             | 18 R       | 404.10       | <b>23.19</b> | <b>427.29</b> | y             |
| 2 R        | 14.10        | 0.00         | 14.10         | n             | 19 R       | 409.10       | <b>23.19</b> | <b>432.29</b> | n             |
| 3 R        | 23.10        | 0.00         | 23.10         | n             | 20 R       | 413.70       | <b>23.19</b> | <b>436.89</b> | n             |
| 4 R        | 32.10        | 0.00         | 32.10         | n             | 21 R       | 418.70       | <b>23.19</b> | <b>441.89</b> | n             |
| 5 R        | 41.10        | <b>-2.52</b> | <b>38.58</b>  | y             | 22 R       | 423.30       | <b>23.64</b> | <b>446.94</b> | y             |
| 6 R        | 50.80        | <b>-3.45</b> | <b>47.35</b>  | y             | 23 R       | 428.30       | <b>25.04</b> | <b>453.34</b> | y             |
| 7 R        | 60.50        | <b>-4.94</b> | <b>55.56</b>  | y             | 24 R       | 432.90       | <b>25.82</b> | <b>458.72</b> | y             |
| 8 R        | 70.10        | <b>-5.21</b> | <b>64.89</b>  | y             | 25 R       | 437.90       | <b>27.10</b> | <b>465.00</b> | y             |
| 9 R        | 79.70        | <b>-5.62</b> | <b>74.08</b>  | y             | 26 R       | 442.50       | <b>27.51</b> | <b>470.01</b> | n             |
| 10 R       | 89.30        | <b>-5.42</b> | <b>83.88</b>  | y             | 27 R       | 447.50       | <b>30.46</b> | <b>477.96</b> | y             |
| 11 R       | 99.00        | <b>-6.39</b> | <b>92.61</b>  | y             | 28 R       | 451.80       | <b>31.58</b> | <b>483.38</b> | y             |
| 12 R       | 108.60       | <b>-5.50</b> | <b>103.10</b> | y             | 29 R       | 456.80       | <b>31.58</b> | <b>488.38</b> | n             |
| 13 R       | 118.20       | <b>-6.55</b> | <b>111.65</b> | y             | 30 R       | 461.40       | <b>31.58</b> | <b>492.98</b> | n             |
| 14 R       | 127.90       | <b>-5.45</b> | <b>122.45</b> | y             | 31 R       | 466.40       | <b>31.58</b> | <b>497.98</b> | n             |
| 15 R       | 137.50       | <b>-5.65</b> | <b>131.85</b> | y             | 32 R       | 471.00       | <b>31.58</b> | <b>502.58</b> | n             |
| 16 R       | 147.20       | <b>-4.60</b> | <b>142.60</b> | y             | 33 R       | 476.00       | <b>31.58</b> | <b>507.58</b> | n             |
| 17 R       | 156.90       | <b>-5.82</b> | <b>151.08</b> | y             | 34 R       | 480.70       | <b>31.58</b> | <b>512.28</b> | n             |

NOTE: Bold numbers indicate changes to ship mcd; n= no; y=yes.

**TABLE S5 TIE POINTS TO CREATE THE REVISED COMPOSITE DEPTH SCALE (RMCD) FOR SITE 1258**

| Hole, core, section,<br>interval (cm) | Depth  |        |        | Hole, core, section,<br>interval (cm) | Depth  |        |
|---------------------------------------|--------|--------|--------|---------------------------------------|--------|--------|
|                                       | (mbsf) | (rmcd) |        |                                       | (mbsf) | (rmcd) |
| 207-                                  |        |        |        |                                       |        |        |
| 1258B-4R-4, 96                        | 37.56  | 37.56  | tie to | 1258A-5R-2, 116                       | 35.86  | 37.56  |
| 1258A-5R-3, 80                        | 37.00  | 38.70  | tie to | 1258B-5R-1, 12                        | 41.22  | 38.70  |
| 1258B-5R-6, 62                        | 49.22  | 46.70  | tie to | 1258A-6R-5, 23                        | 49.03  | 46.70  |
| 1258A-6R-6, 140                       | 51.70  | 49.37  | tie to | 1258B-6R-2, 52                        | 52.82  | 49.37  |
| 1258B-6R-3, 82                        | 54.62  | 51.17  | tie to | 1258A-7R-1, 66                        | 53.16  | 51.17  |
| 1258A-7R-5, 40                        | 58.60  | 56.61  | tie to | 1258B-7R-1, 105                       | 61.55  | 56.61  |
| 1258B-7R-5, 32                        | 66.82  | 61.88  | tie to | 1258A-8R-2, 105                       | 64.75  | 61.88  |
| 1258A-8R-5, 20                        | 68.37  | 65.50  | tie to | 1258B-8R-1, 61                        | 70.71  | 65.50  |
| 1258B-8R-3, 42                        | 73.52  | 68.31  | tie to | 1258A-9R-1, 87                        | 72.77  | 68.31  |
| 1258A-9R-6, 114                       | 80.54  | 76.08  | tie to | 1258B-9R-2, 50                        | 81.70  | 76.08  |
| 1258B-9R-3, 80                        | 83.50  | 77.88  | tie to | 1258A-10R-1, 50                       | 82.10  | 77.88  |
| 1258A-10R-5, 140                      | 89.00  | 84.78  | tie to | 1258B-10R-1, 90                       | 90.20  | 84.78  |
| 1258B-10R-4, 74                       | 94.54  | 89.12  | tie to | 1258A-11R-3, 11                       | 94.41  | 89.12  |
| 1258A-11R-5, 82                       | 98.12  | 92.83  | tie to | 1258B-11R-1, 22                       | 99.22  | 92.83  |
| 1258B-11R-5, 74                       | 105.74 | 99.35  | tie to | 1258A-12R-3, 122                      | 105.12 | 99.35  |
| 1258A-12R-6, 74                       | 109.14 | 103.37 | tie to | 1258B-12R-1, 27                       | 108.87 | 103.37 |
| 1258B-12R-2, 100                      | 111.10 | 105.60 | tie to | 1258A-13R-1, 65                       | 111.15 | 105.60 |
| 1258A-13R-6, 72                       | 118.72 | 113.17 | tie to | 1258B-13R-2, 2                        | 119.72 | 113.17 |
| 1258B-13R-7, 38                       | 127.58 | 121.03 | tie to | 1258C-1R-5, 82                        | 126.82 | 121.03 |
| 1258C-1R-7, 52                        | 129.52 | 123.73 | tie to | 1258B-14R-1, 128                      | 129.18 | 123.73 |
| 1258B-14R-6, 60                       | 136.00 | 130.55 | tie to | 1258C-2R-4, 56                        | 134.46 | 130.55 |
| 1258C-2R-7, 12                        | 138.52 | 134.61 | tie to | 1258B-15R-2, 126                      | 140.26 | 134.61 |
| 1258B-15R-6, 86                       | 145.86 | 140.21 | tie to | 1258C-3R-4, 26                        | 143.76 | 140.21 |
| 1258C-3R-6, 72                        | 147.22 | 143.67 | tie to | 1258B-16R-1, 107                      | 148.27 | 143.67 |
| 1258B-16R-2, 96                       | 149.66 | 145.06 | tie to | 1258C-4R-1, 80                        | 149.40 | 145.06 |
| 1258C-4R-6, 42                        | 156.52 | 152.18 | tie to | 1258B-17R-1, 110                      | 158.00 | 152.18 |
| 1258B-17R-6, 14                       | 164.34 | 158.52 | tie to | 1258A-16R-3, 64                       | 143.04 | 158.52 |
| 1258A-16R-6, 30                       | 147.20 | 162.68 | tie to | 1258B-18R-2, 35                       | 168.35 | 162.68 |
| 1258B-18R-5, 66                       | 173.16 | 167.49 | tie to | 1258A-17R-2, 141                      | 151.96 | 167.49 |
| 1258A-17R-5, 137                      | 156.42 | 171.95 | tie to | 1258B-19R-2, 77                       | 178.37 | 171.95 |
| 1258B-19R-4, 32                       | 180.92 | 174.50 | tie to | 1258A-18R-1, 27                       | 158.97 | 174.50 |
| 1258A-18R-6, 146                      | 167.66 | 183.19 | tie to | 1258C-8R-2, 46                        | 189.16 | 183.19 |
| 1258C-8R-3, 38                        | 190.58 | 184.61 | tie to | 1258A-19R-1, 73                       | 169.13 | 184.61 |
| 1258A-19R-7, 56                       | 177.12 | 192.60 | tie to | 1258C-9R-1, 37                        | 196.87 | 192.60 |
| 1258C-9R-4, 148                       | 202.48 | 198.21 | tie to | 1258A-20R-4, 93                       | 183.53 | 198.21 |
| 1258A-20R-CC, 15                      | 185.54 | 200.22 |        | end of splice                         |        |        |

**TABLE S6 MAGNETOSTRATIGRAPHY OF SITE 1258 ACCORDING TO THE REVISED COMPOSITE DEPTH (RMCD)**

| Chron       | Top           |                           |                 |                 | Bottom        |                           |                 |                 | Mean<br>Depth<br>(rmcd) |
|-------------|---------------|---------------------------|-----------------|-----------------|---------------|---------------------------|-----------------|-----------------|-------------------------|
|             | Site,<br>Hole | section,<br>interval (cm) | Depth<br>(mbsf) | Depth<br>(rmcd) | Site,<br>Hole | section,<br>interval (cm) | Depth<br>(mbsf) | Depth<br>(rmcd) |                         |
| C21n (y)    | 1258A         | 3R-4, 83                  | 19.53           | 19.53           | 1258A         | 3R-5, 122                 | 21.42           | 21.42           | 20.48                   |
| C21n (o)    | 1258A         | 5R-3, 18                  | 36.38           | 38.08           | 1258B         | 4R-5, 47                  | 38.57           | 38.57           | 38.33                   |
| C22n (y)    | 1258A         | 6R-5, 12                  | 48.92           | 46.59           | 1258B         | 5R-6, 73                  | 49.33           | 46.81           | 46.70                   |
| C22n (o)    | 1258A         | 7R-1, 113                 | 53.63           | 51.64           | 1258A         | 7R-2, 74                  | 54.44           | 52.45           | 52.05                   |
| C23n.1n (y) | 1258A         | 9R-1, 17                  | 72.07           | 67.61           | 1258B         | 8R-3, 33                  | 73.43           | 68.22           | 67.92                   |
| C23n.1n (o) | 1258A         | 9R-3, 12                  | 75.02           | 70.56           | 1258A         | 9R-3, 129                 | 76.19           | 71.73           | 71.15                   |
| C23n.2n (y) | 1258A         | 9R-3, 129                 | 76.19           | 71.73           | 1258A         | 9R-4, 74                  | 77.14           | 72.68           | 72.21                   |
| C23n.2n (o) | 1258A         | 10R-1, 34                 | 81.94           | 77.72           | 1258B         | 9R-3, 144                 | 84.14           | 78.52           | 78.12                   |
| C24n.1n (y) | 1258B         | 11R-1, 55                 | 99.55           | 93.16           | 1258B         | 11R-1, 139                | 100.39          | 94.00           | 93.58                   |
| C24n.1n (o) | 1258A         | 12R-4, 71                 | 106.11          | 100.34          | 1258A         | 12R-5, 37                 | 107.27          | 101.50          | 100.92                  |
| C24n.2n (y) | 1258A         | 12R-6, 76                 | 109.16          | 103.39          |               |                           |                 |                 | 103.39                  |
| C24n.2n (o) |               |                           |                 |                 | 1258A         | 12R-9, 4                  | 110.64          | 104.87          | 104.87                  |
| C24n.3n (y) | 1258A         | 13R-2, 92                 | 112.92          | 107.37          | 1258A         | 13R-3, 18                 | 113.68          | 108.13          | 107.75                  |
| C24n.3n (o) | 1258B         | 13R-6, 121                | 126.91          | 120.36          | 1258B         | 13R-7, 68                 | 127.88          | 121.33          | 120.85                  |

**TABLE S7 RELATIVE AGE MODEL**

| Depth<br>(rmcd) | Eocene 405-k.y.<br>Cycle-number | relative age<br>(Ec <sub>405</sub> 21 = 1000 k.y.) |
|-----------------|---------------------------------|----------------------------------------------------|
| 37.00           | Ec <sub>405</sub> 21            | 1000                                               |
| 41.25           | Ec <sub>405</sub> 20            | 1405                                               |
| 42.75           | Ec <sub>405</sub> 19            | 1810                                               |
| 45.50           | Ec <sub>405</sub> 18            | 2215                                               |
| 48.25           | Ec <sub>405</sub> 17            | 2620                                               |
| 52.00           | Ec <sub>405</sub> 16            | 3025                                               |
| 56.00           | Ec <sub>405</sub> 15            | 3430                                               |
| 61.00           | Ec <sub>405</sub> 14            | 3835                                               |
| 64.25           | Ec <sub>405</sub> 13            | 4240                                               |
| 70.00           | Ec <sub>405</sub> 12            | 4645                                               |
| 76.00           | Ec <sub>405</sub> 11            | 5050                                               |
| 83.00           | Ec <sub>405</sub> 10            | 5455                                               |
| 91.50           | Ec <sub>405</sub> 9             | 5860                                               |
| 99.00           | Ec <sub>405</sub> 8             | 6265                                               |
| 107.00          | Ec <sub>405</sub> 7             | 6670                                               |
| 116.00          | Ec <sub>405</sub> 6             | 7075                                               |
| 126.00          | Ec <sub>405</sub> 5             | 7480                                               |
